# Supplementary material for: mRNA COVID-19 vaccine elicits potent adaptive immune response without the acute inflammation of SARS-CoV-2 infection
Source: PubMed Central journal article supplement — iScience. 2023 Nov 24;26(12):108572. doi: 10.1016/j.isci.2023.108572 (PMC10783604; doi:10.1016/j.isci.2023.108572), 2023-11-24
Supplement: mmc1.pdf [file mmc1.pdf]

## **Supplemental information**

### **mRNA COVID-19 vaccine elicits potent adaptive immune response without the acute inflammation of SARS-CoV-2 infection**

**Ellie N. Ivanova, Jasmine Shwetar, Joseph C. Devlin, Terkild B. Buus, Sophie Gray-Gaillard, Akiko Koide, Amber Cornelius, Marie I. Samanovic, Alberto Herrera, Eleni P. Mimitou, Chenzhen Zhang, Trishala Karmacharya, Ludovic Desvignes, Niels Ødum, Peter Smibert, Robert J. Ulrich, Mark J. Mulligan, Shohei Koide, Kelly V. Ruggles, Ramin S. Herati, and Sergei B. Koralov**

# Table S1

| Participant | Cohort         | Age   | Sex    | Race             | BMI  | Days post onset symptoms or days since first vaccine dose |    | Fraction inspired O <sub>2</sub> | Days since booster | WHO COVID severity scale | COVID Outcome                                          | Co-morbidities |
|-------------|----------------|-------|--------|------------------|------|-----------------------------------------------------------|----|----------------------------------|--------------------|--------------------------|--------------------------------------------------------|----------------|
|             |                |       |        |                  |      |                                                           |    |                                  |                    |                          |                                                        |                |
| SK-010      | Acute COVID-19 | 36-40 | Female | Asian            | NA   | 12                                                        | 21 | NA                               | 5                  | Recovered                | NA                                                     |                |
|             |                |       |        |                  |      | 24                                                        | 21 |                                  |                    |                          |                                                        |                |
| SK-011      | Acute COVID-19 | 56-60 | Female | Caucasian        | 35.7 | 6                                                         | 32 | NA                               | 7                  | Recovered                | Type 2 Diabetes, Hypertension, Hyperlipidemia, Obesity |                |
|             |                |       |        |                  |      | 13                                                        | 24 |                                  |                    |                          |                                                        |                |
| SK-012      | Acute COVID-19 | 41-45 | Male   | Caucasian        | 24.7 | 8                                                         | 38 | NA                               | 8                  | Recovered                | Asthma, Anxiety, Depression                            |                |
|             |                |       |        |                  |      | 24                                                        | 38 |                                  |                    |                          |                                                        |                |
| SK-013      | Acute COVID-19 | 61-65 | Male   | NA               | NA   | 6                                                         | 38 | NA                               | 5                  | Recovered                | NA                                                     |                |
|             |                |       |        |                  |      | 11                                                        | 28 |                                  |                    |                          |                                                        |                |
| SK-014      | Acute COVID-19 | 51-55 | Female | Asian            | NA   | 9                                                         | 21 | NA                               | 5                  | Recovered                | NA                                                     |                |
| CV-001      | mRNA vaccine   | 36-40 | Male   | Asian            | 28.4 | 0, 7, 14, 21, 28, 35                                      | 21 | 0, 7, 28                         | NA                 | NA                       | NA                                                     |                |
| CV-003      | mRNA vaccine   | 31-35 | Male   | Asian            | 27.9 | 0, 10, 20, 28, 35                                         | 21 | 0, 7, 28                         | NA                 | NA                       | Hypothyroidism                                         |                |
| CV-011      | mRNA vaccine   | 36-40 | Male   | Caucasian        | 28.6 | 0, 7, 14, 21, 29, 36                                      | 21 | 0, 7                             | NA                 | NA                       | NA                                                     |                |
| CV-012      | mRNA vaccine   | 51-55 | Female | Caucasian        | 28.7 | 0, 7, 21, 28                                              | 21 | NA                               | NA                 | NA                       | NA                                                     |                |
| CV-022      | mRNA vaccine   | 41-45 | Male   | Caucasian        | 22.4 | 0, 7, 21, 28                                              | 21 | NA                               | NA                 | NA                       | Facial Cellulitis, GERD                                |                |
| CV-053      | mRNA vaccine   | 46-50 | Female | African-American | NA   | 0, 7, 21, 28                                              | 21 | NA                               | NA                 | NA                       | Fibroids, HSV, GERD                                    |                |
| CV-056      | mRNA vaccine   | 51-55 | Female | Caucasian        | 25.4 | 0, 7, 21, 28                                              | 21 | NA                               | NA                 | NA                       | NA                                                     |                |
| SK-007      | HC             | 36-40 | Female | Caucasian        | 20.4 | 0                                                         | 21 | NA                               | NA                 | NA                       | NA                                                     |                |
| SK-008      | HC             | 36-40 | Female | Caucasian        | 28.6 | 0                                                         | 21 | NA                               | NA                 | NA                       | NA                                                     |                |

**Table S1. Demographic characteristics, clinical features, and outcomes for study participants, Related to Schematic 1.**

## Figure S1

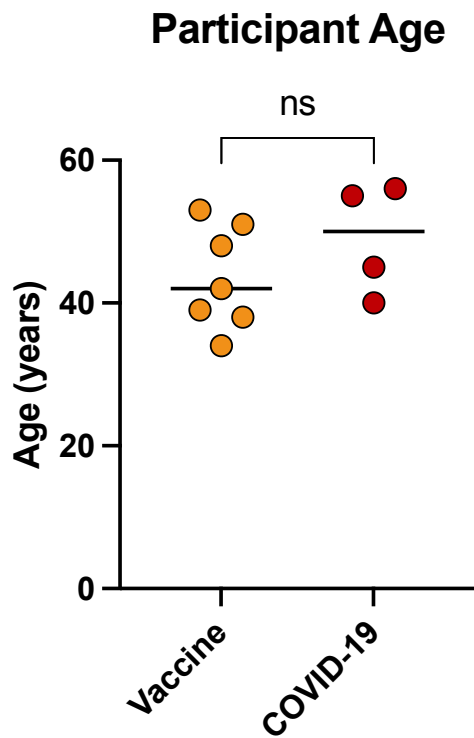

**Figure S1. Participant age, Related to Schematic 1.** Scatter plot of age for all healthy volunteers who received SARS-CoV2 vaccine and COVID-19 patients in Supplemental Table 1. P-value were determined by Welch's t-test (ns  $p > 0.05$ , \*  $p < 0.05$ , \*\*  $p < 0.01$ , \*\*\*  $p < 0.001$ ).

# Figure S2

## A

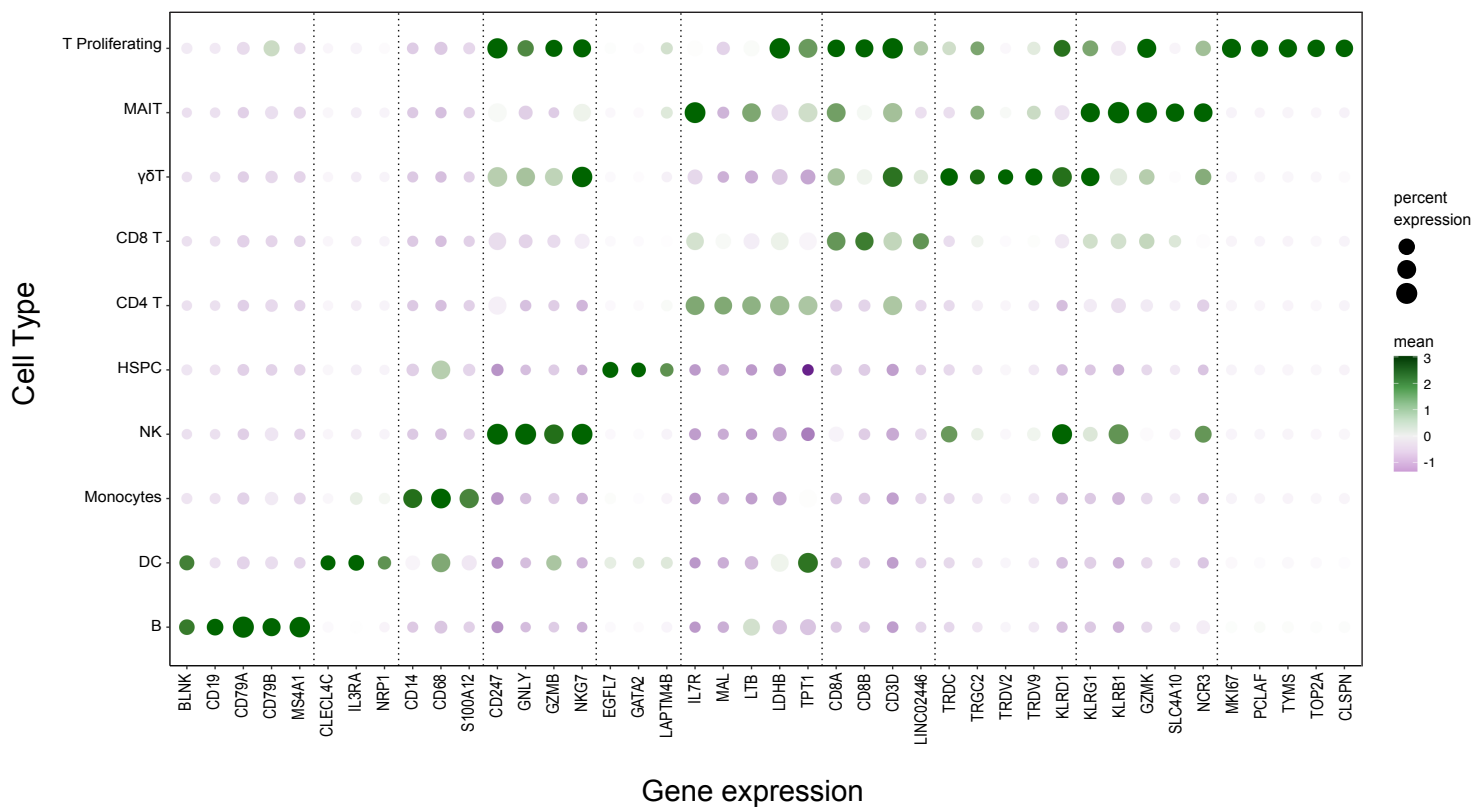

## B

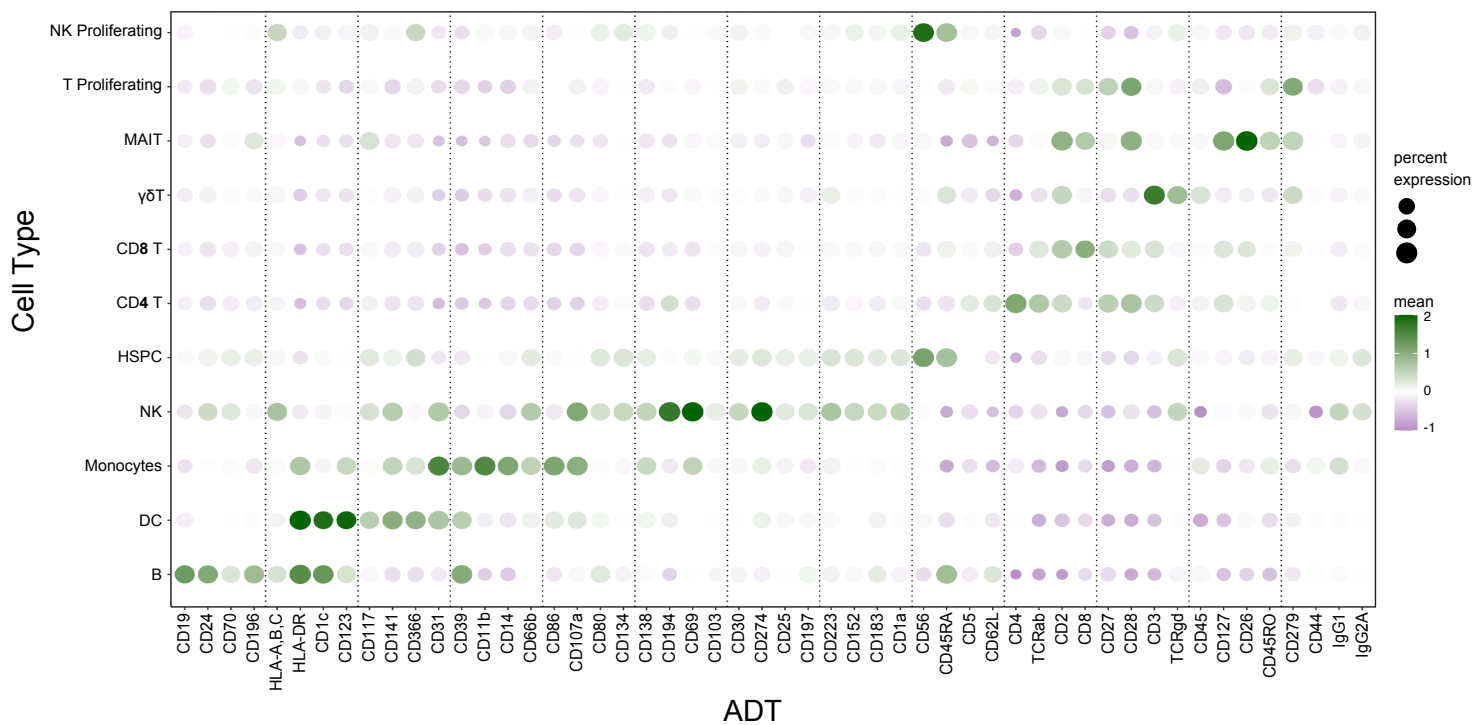

**Figure S2. Surface protein and gene expression across identified populations, Related to Figure 1.** **A.** Dot plot illustrating the expression of key markers across the major cell populations identified. The gene names are shown on the x-axis and the identities of the cell populations on the y-axis. Downregulated markers are colored in purple and upregulated markers in green. The size of the dots represents the fraction of cells expressing the specific marker and the color intensity represents the average expression level. **B.** Dot plot illustrating the distribution of antibody-derived tags (ADT) expression across the major cell populations identified. The protein markers are shown on the x-axis and the identities of the cell populations on the y-axis. Downregulated markers are colored in purple and upregulated markers in green. The size of the dots represents the fraction of cells expressing the specific marker and the color intensity represents the average expression level.

**Table S2**

| Cell Population | Subpopulation                 | Markers                                                           |
|-----------------|-------------------------------|-------------------------------------------------------------------|
| B cells         | Memory                        | MS4A1, COCH, AIM2, BANK1, CD79A                                   |
|                 | Resting                       | IL4R, CXCR4, BTG1, TCL1A, YBX3                                    |
|                 | Plasmablasts                  | MZB1, TNFRSF17, CPNE5, POU2AF1                                    |
|                 | Activated                     | FOSB, CD196 (ADT)                                                 |
| T cells         | T Proliferating               | MKI67, TOP2A, PCLAF, TYMS, RRM2                                   |
|                 | CD4 T CM                      | CD4, TCF7, IL7R                                                   |
|                 | CD4 T Regulatory              | CD4, CTLA4, FOXP3, IL2RA                                          |
|                 | CD4 Activated                 | CD4, CCL5, FYB1, GZMK, IL32, TRAC, KLRB, GZMA, ZEB2               |
|                 | CD8 Naïve                     | CCR7, CD8A, CD8B                                                  |
|                 | CD8 EM                        | CD8A, CD28, CD127, CD45RO, CCL5, NKG7                             |
| T innate cells  | MAIT                          | TRAV1-2, SLC4A10, KLRB1, GZMK, IL7R, SLC4A10, CXCR6, CD45RO (ADT) |
|                 | NK                            | GNLY, TYROBP, NKG7, FGFBP2, KLRF1                                 |
|                 | $\gamma\delta$ T              | TRDC, TRGC2, KLRC1, NKG7, TRDV2, TRGV9, KLRG1                     |
|                 | NK Proliferating              | GNLY, NKG7, MKI67, TOP2A, STMN1, TYMS                             |
| Myeloid cells   | pDC                           | CLEC4C, IL3RA                                                     |
|                 | Classical Monocytes           | CD14, LYZ, CD36                                                   |
|                 | NKG7 <sup>+</sup> Monocytes   | LYZ, NKG7, GNLY                                                   |
|                 | Non-classical monocytes       | FCGR3A, MS4A7, CDKN1C                                             |
|                 | NEAT1 <sup>hi</sup> Monocytes | CD14, NEAT1                                                       |

**Table S2. Markers used to delineate immune cell subsets, Related to Figure 1.**

# Figure S3

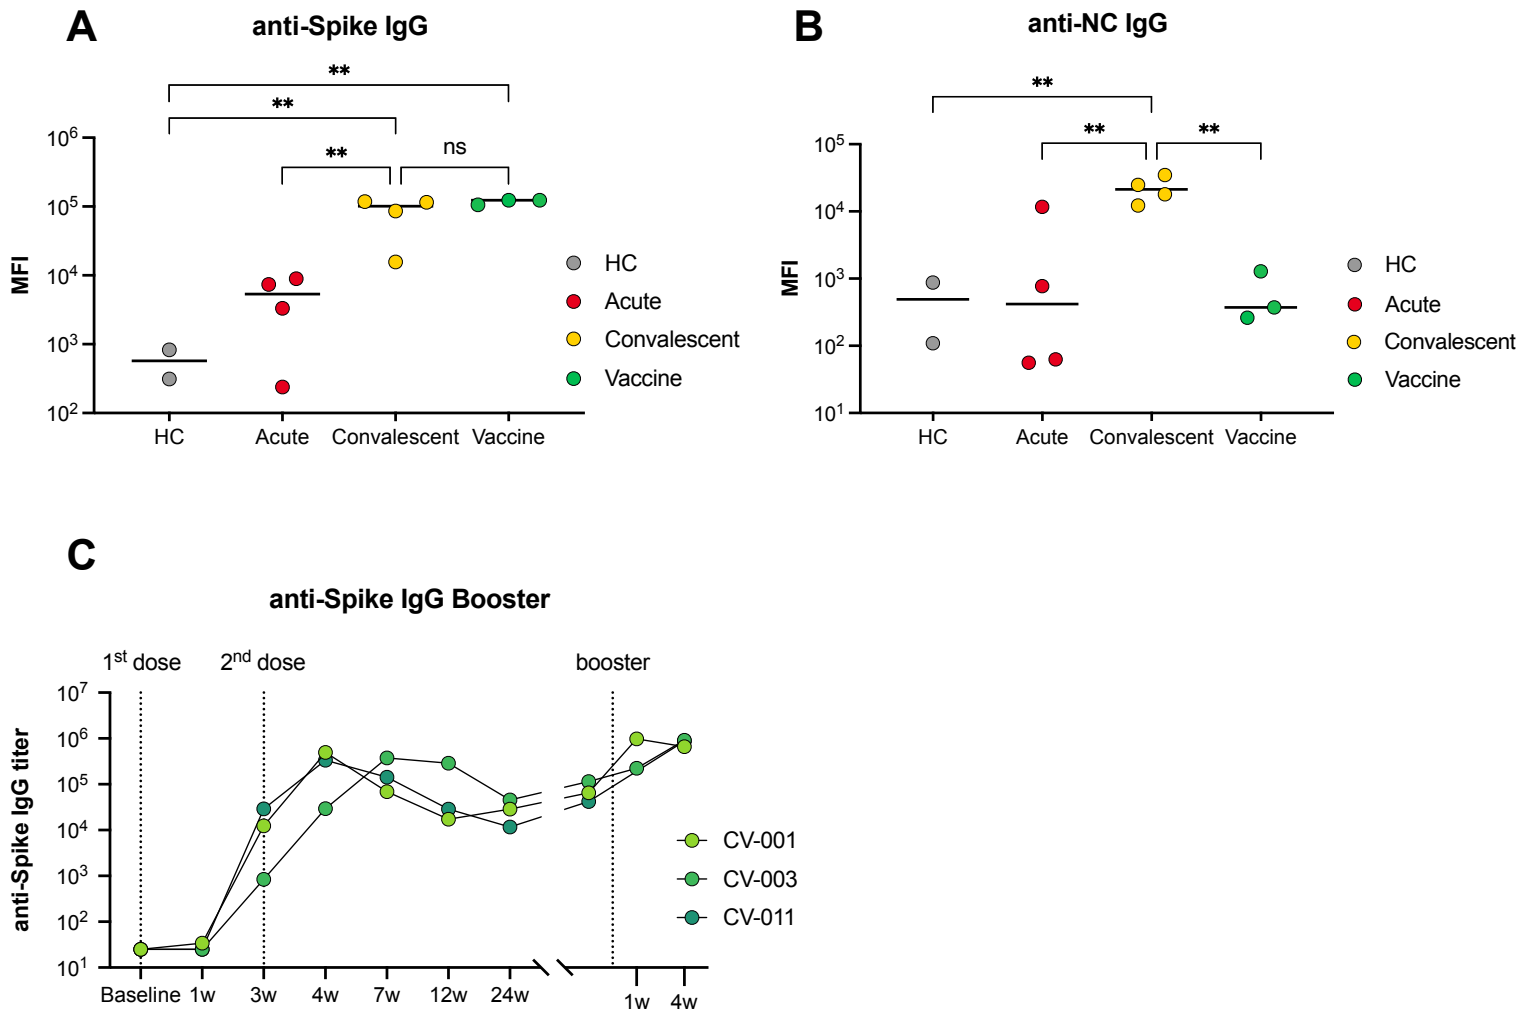

**Figure S3. Ab titers and plasmablast responses, Related to Figure 2.** A,B. SARS-CoV-2-specific Ab titers were assessed for COVID-19 patients and healthy volunteers using Multiplex Bead Binding Assay (MBBA). IgG anti-Spike responses are shown in (A), anti-NC responses in (B). COVID-19 patient samples are split by days post-onset (DPO) of symptoms into acute ( $\leq 10$  DPO) and convalescent ( $> 10$  DPO). For the vaccine group, samples collected 4 weeks post-first vaccine dose were used. P-value were determined by Welch's t-test (ns  $p > 0.05$ , \*  $p < 0.05$ , \*\*  $p < 0.01$ , \*\*\*  $p < 0.001$ ). C. Spike-specific Ab titers for 3 healthy volunteers before and after receiving the BNT162b2 mRNA vaccine and booster, assessed by direct ELISA.

**Figure S4**

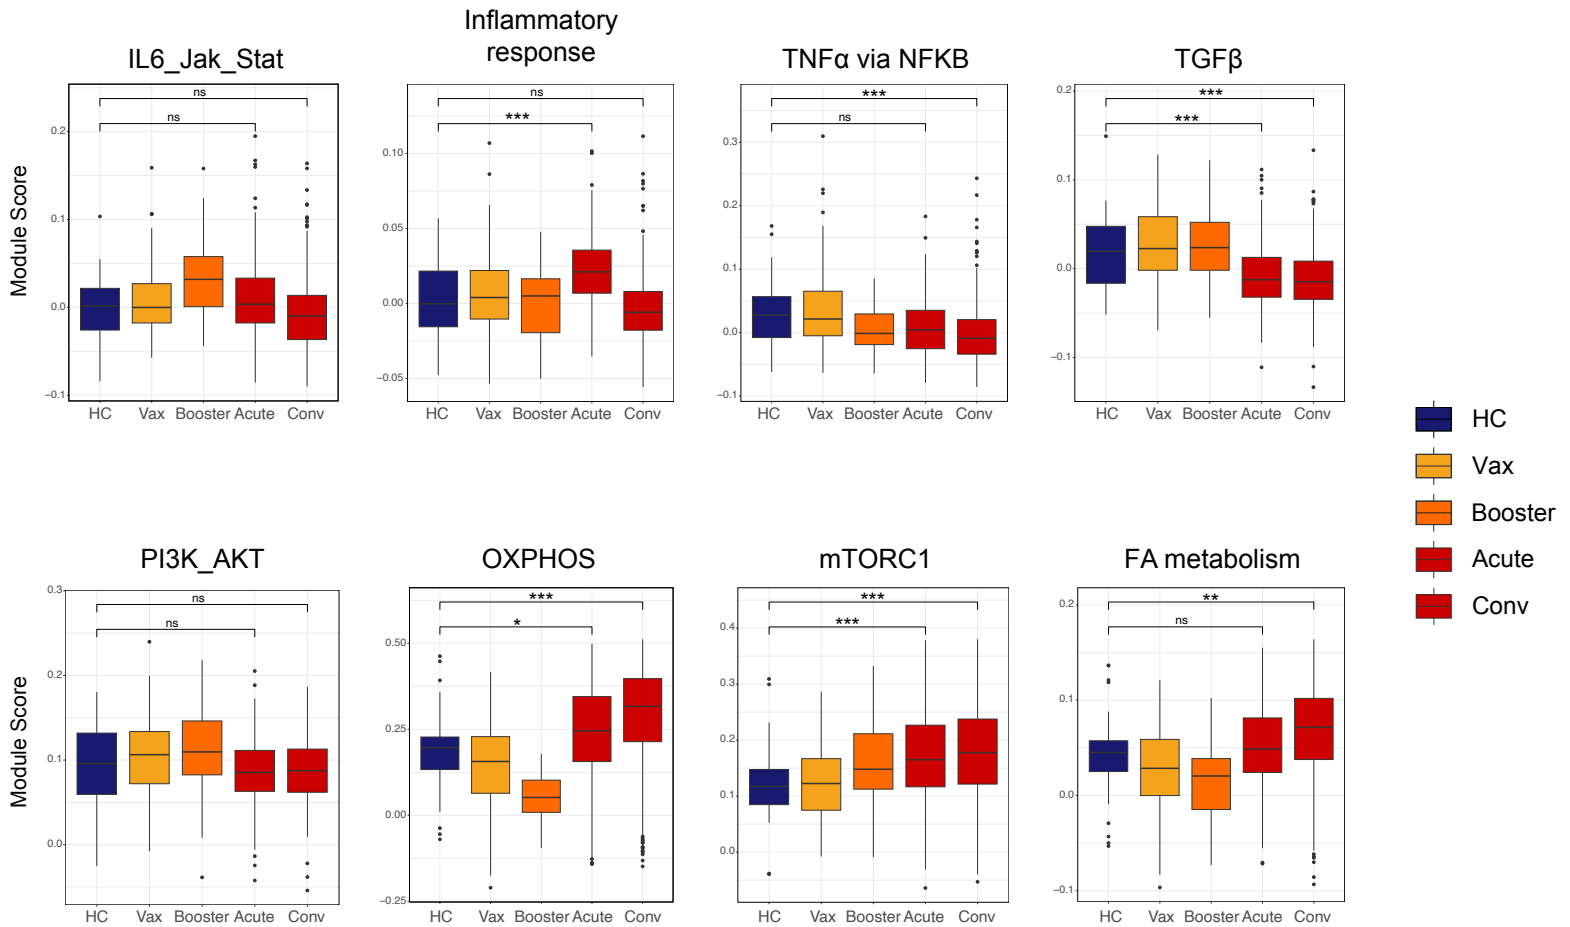

**Figure S4. Pathway enrichment in plasmablasts module score, Related to Figure 2.** Module scores for the pathways in **Figure 2A** were calculated using the AddModuleScore function from the Seurat package, which calculates the mean expression for a set of genes and adjusts for the collective expression of control features. The p-values were computed using the Wilcoxon test to compare the median module scores across a range of conditions (ns  $p > 0.05$ , \*  $p < 0.05$ , \*\*  $p < 0.01$ , \*\*\*  $p < 0.001$ ).



## Figure S5

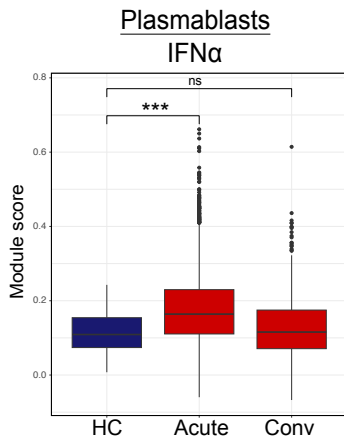

**Figure S5. IFN-I gene pathway enrichment in plasmablasts module score in Haniffa data set, Related to Figure 2A,B.** Module scores were calculated for plasmablasts in the Haniffa acute and convalescent COVID-19 samples [S1] using the AddModuleScore function from the Seurat package, which calculates the mean expression for a set of genes and adjusts for the collective expression of control features. The p-values were computed using the Wilcoxon test to compare the median module scores across a range of conditions (ns  $p > 0.05$ , \*  $p < 0.05$ , \*\*  $p < 0.01$ , \*\*\*  $p < 0.001$ ).

**Figure S6**

**A**

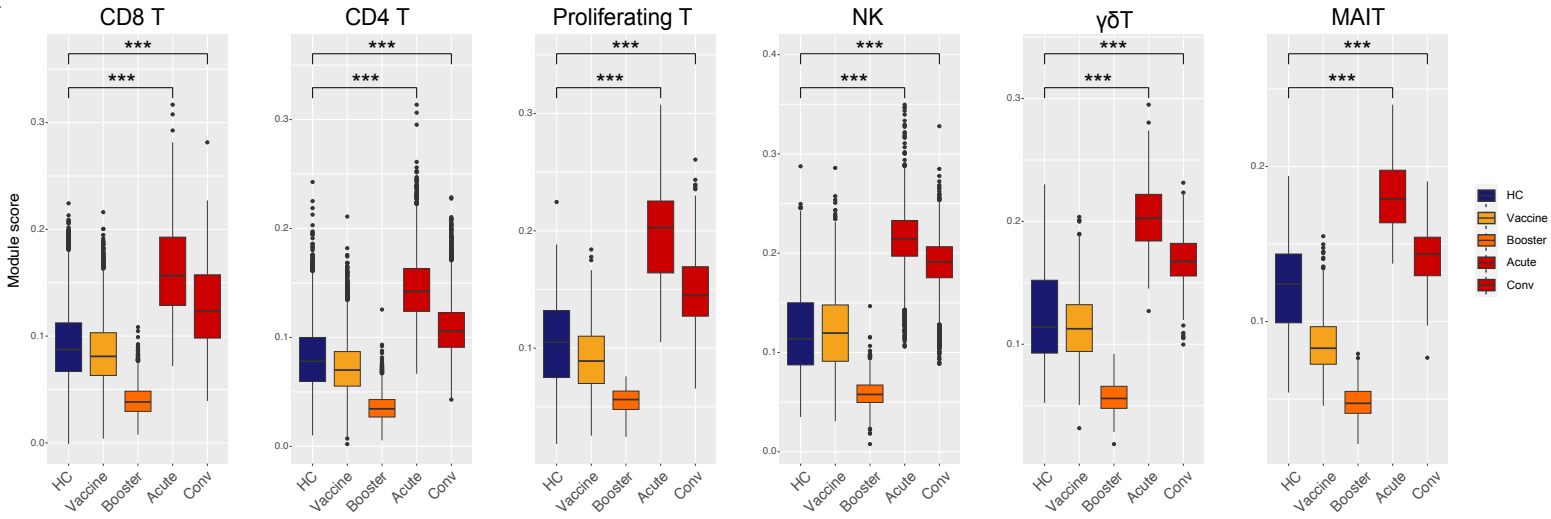

**B**

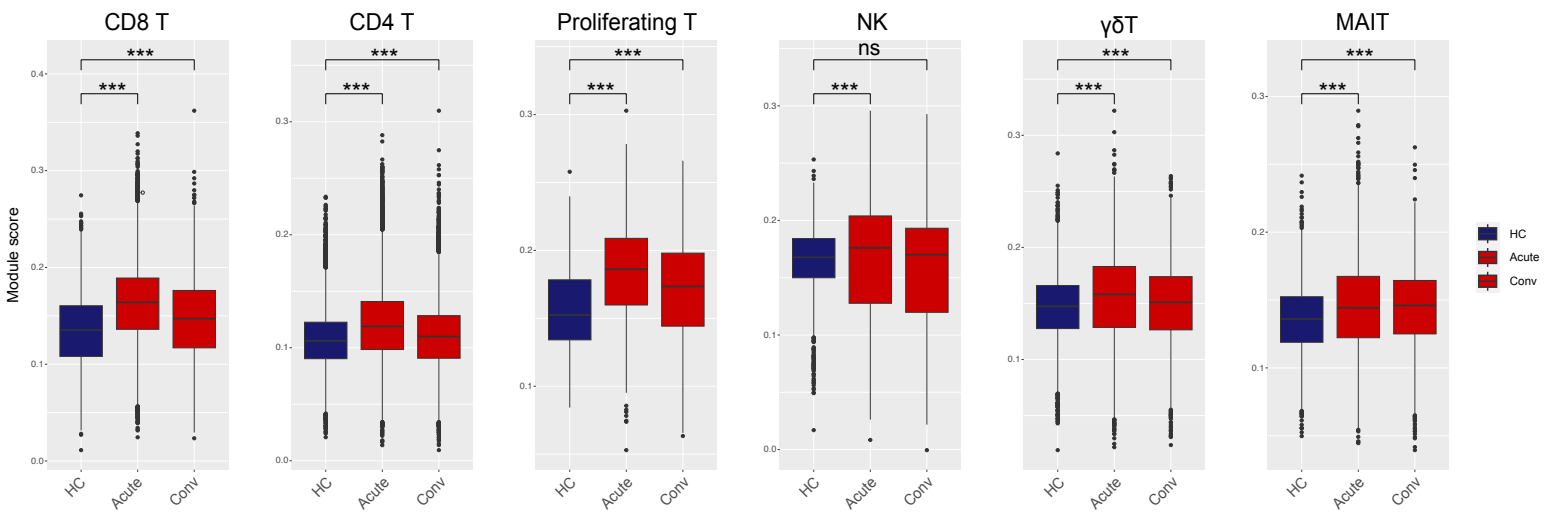

**C**

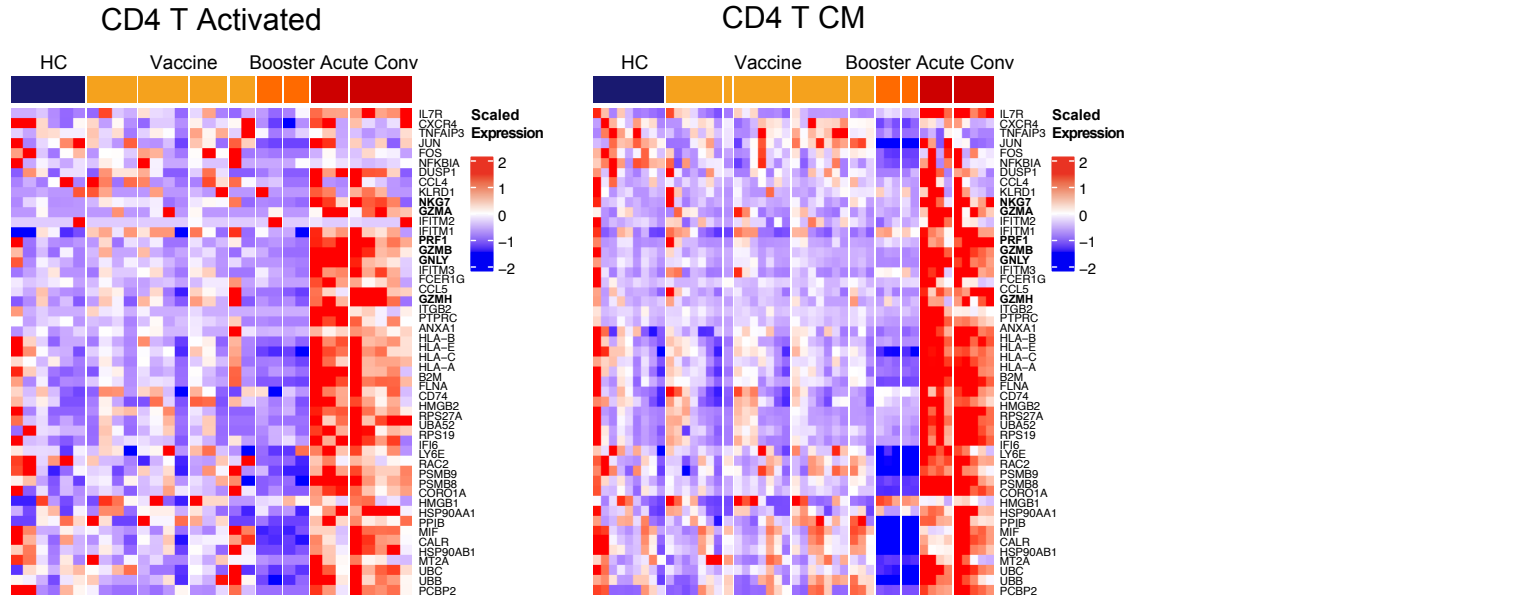

**Figure S6. Cytotoxic responses and clonality of conventional and innate-like T cells in COVID-19 and SARS-CoV-2 vaccine recipients, Related to Figure 3C. A,B.** Module scores were calculated based on expression of genes associated with cytotoxic effector function from the gene set T cell mediated cytotoxicity (GO:0001913) in major conventional and innate-like T cell populations in our data set (**A**) and validated in Haniffa data set (**B**) [S1]. The p-values were computed using the Wilcoxon test to compare the median module scores across a range of conditions (ns  $p > 0.05$ , \*  $p < 0.05$ , \*\*  $p < 0.01$ , \*\*\*  $p < 0.001$ ). **C.** Average per-sample scaled expression of genes associated with cytotoxic effector function from the gene set T cell mediated cytotoxicity (GO:0001913) in activated CD4 and CD4 CM T cells.

## Figure S7

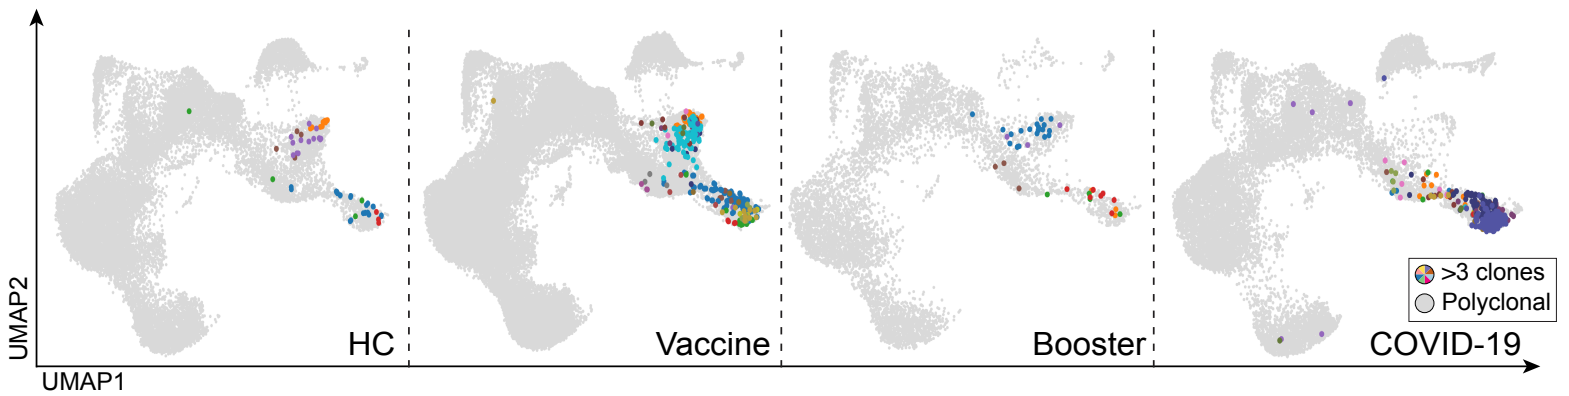

**Figure S7. SARS-CoV-2 reactive CD8 T cell clones, Related to Figure 3D,E.** UMAP visualization of CD8 T cell clones that match reported TCR $\beta$  sequences from natural and synthetic exposure to SARS-CoV-2. Since clusters CD8 T Effector Memory and CD4 T Activated overlap in UMAP space, we confirmed that all clonal cells were from the CD8 T Effector Memory population. At a 100% sequence identity threshold, clonal TCR $\alpha\beta$  CDR3 amino acid sequences were compared to CDR3 sequences from spike-specific T cell clones using the cd-hit-2d command from the CD-HIT package. Identical CDR3 sequences in at least 3 cells that had matches to CDR3s in the AIM assay are colored uniquely.

## Figure S8

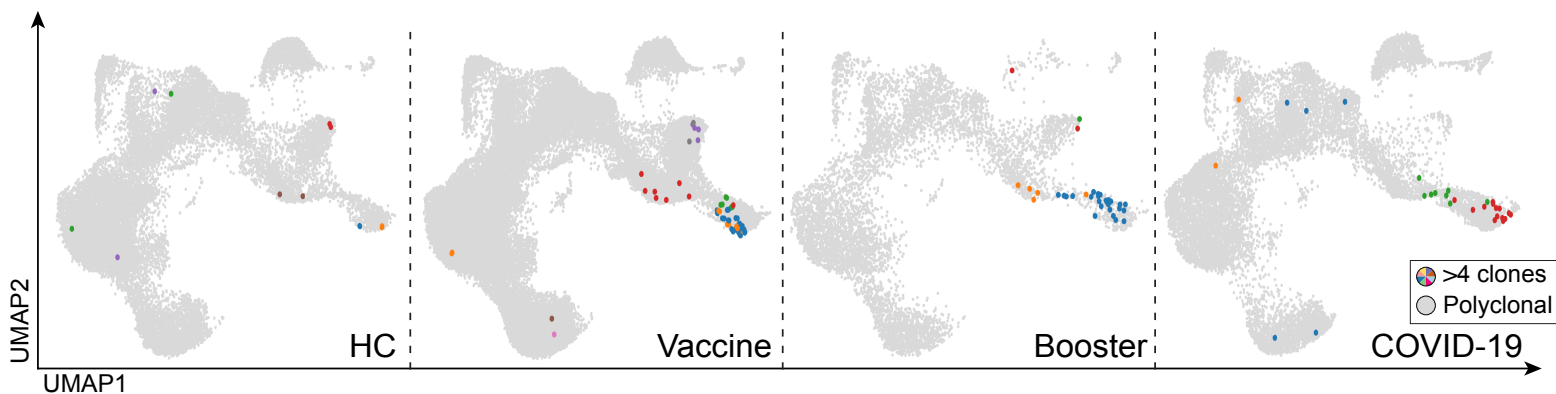

**Figure S8. SARS-CoV-2 reactive CD4 T cell clones, Related to Figure 3D,E.** UMAP visualization of T cells expressing TCRs with CDR3 sequences found in SARS-CoV-2 reactive T cells in antigen-induced activation (AIM) assay using Spike peptides [S2]. At a 95% sequence identity threshold, clonal TCR $\alpha\beta$  CDR3 amino acid sequences were compared to CDR3 sequences from spike-specific T cell clones using the cd-hit-2d command from the CD-HIT package. Identical CDR3 sequences in at least 4 cells that had matches to CDR3s in the AIM assay are colored uniquely.

## Figure S9

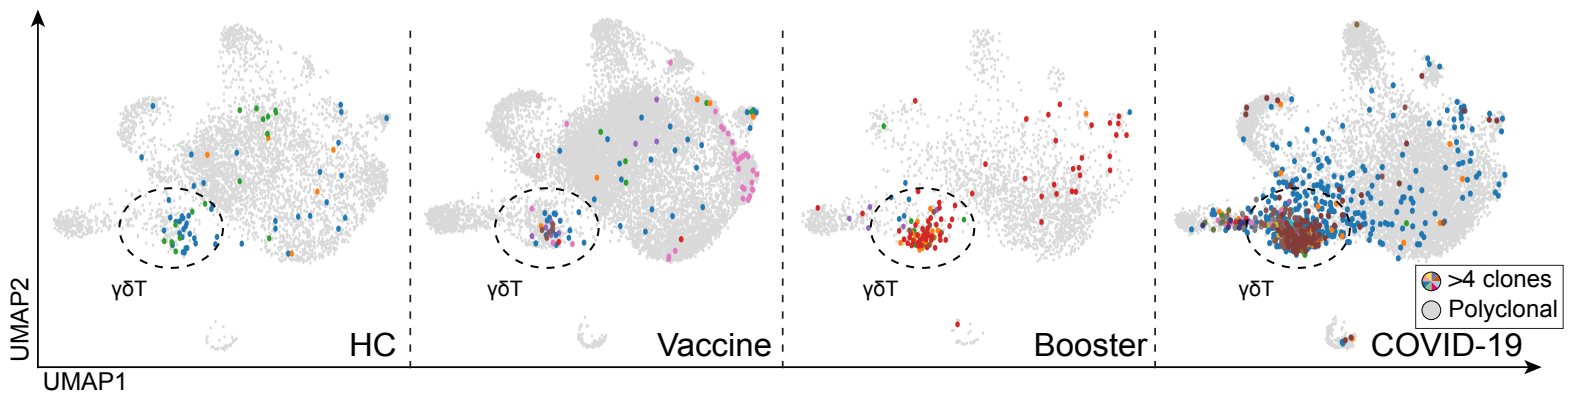

**Figure S9. Clonality of  $\gamma\delta$  T cell, Related to Figure 3F.** UMAP visualization of clonal  $\gamma\delta$  T cells from healthy volunteers before (first panel) and after (second panel) receiving the BNT162b2 mRNA vaccine and booster (third panel), and COVID-19 patients (fourth panel). Clonality is determined by the CDR3 sequence in TCR $\delta$  chain. Identical CDR3 sequences in at least 5 cells are colored uniquely.

## References:

- S1. Stephenson, E., Reynolds, G., Botting, R.A., Calero-Nieto, F.J., Morgan, M.D., Tuong, Z.K., Bach, K., Sungnak, W., Worlock, K.B., Yoshida, M., et al. (2021). Single-cell multi-omics analysis of the immune response in COVID-19. *Nat Med* 27, 904-916. [10.1038/s41591-021-01329-2](https://doi.org/10.1038/s41591-021-01329-2).
- S2. Gray-Gaillard, S.L., Solis, S., Monteiro, C., Chen, H.M., Ciabattini, G., Samanovic, M.I., Cornelius, A.R., Williams, T., Geesey, E., Rodriguez, M., et al. (2022). Molecularly distinct memory CD4<sup>+</sup> T cells are induced by SARS-CoV-2 infection and mRNA vaccination. *bioRxiv*. [10.1101/2022.11.15.516351](https://doi.org/10.1101/2022.11.15.516351).
